# Supplementary material for: MicroRNA-127 inhibits cell proliferation via targeting Kif3b in pancreatic β cells
Source: Aging (Albany NY). 2019 Mar 1;11(5):1342–55. doi: 10.18632/aging.101835 (PMC6428088; doi:10.18632/aging.101835)
Supplement: Supplementary File [file aging-11-101835-s001.pdf]

## SUPPLEMENTARY MATERIAL

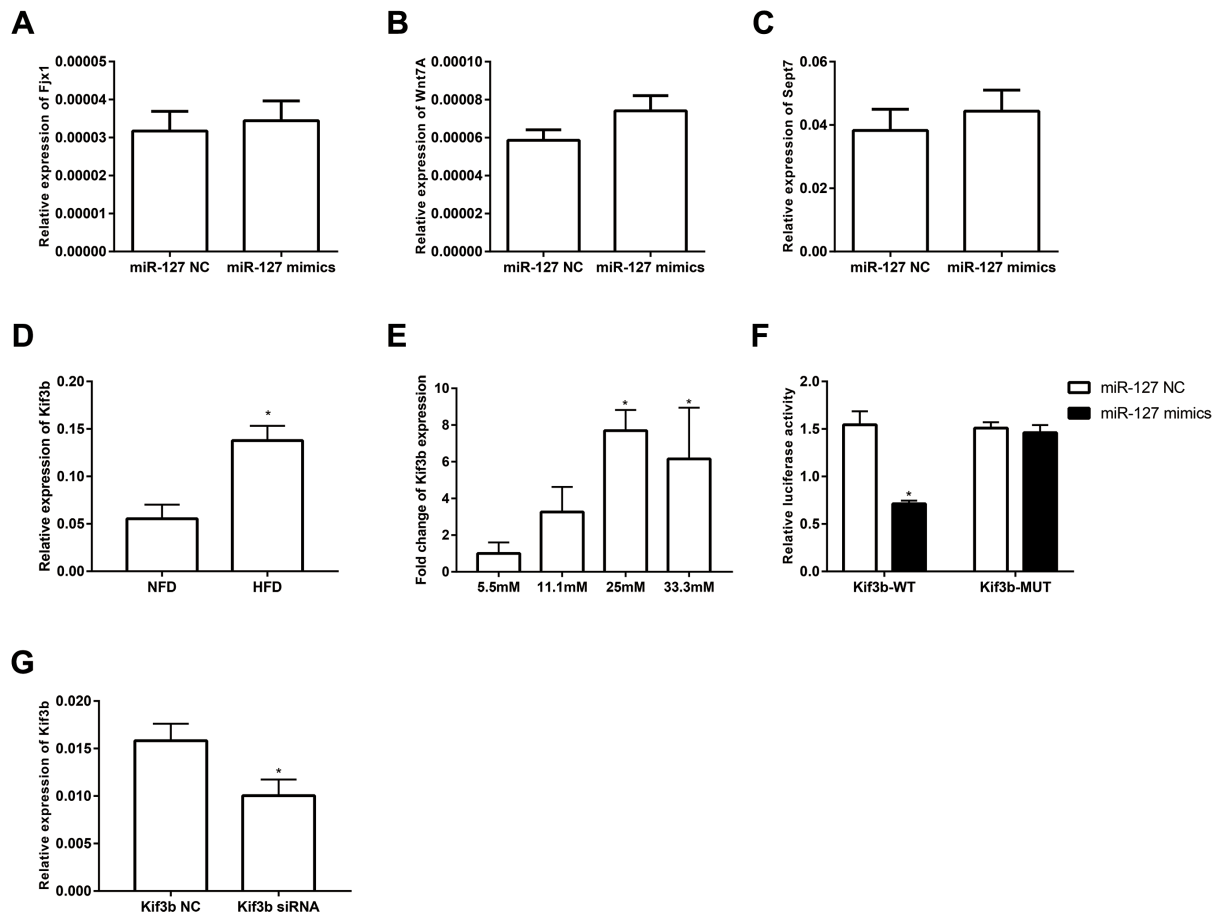

**Supplementary Figure 1. miR-127 did not affect expression of other predicted target genes.** The expression level of the candidate genes: Fjx1 (A), Wnt7a (B), Sept7 (C) in miR-127 NC or miR-127 mimics transfected MIN6 cells. Expression of Kif3b in 20-week old HFD/ NFD islets (D) and in MIN6 cells cultured with the indicated concentrations of glucose (E) was measured by qRT-PCR. (F) Luciferase assay of the reporter plasmids harboring the intact and mutant Kif3b-3'UTR in HEK293T cells. (G) Efficiency of siRNA-mediated Kif3b knockdown was analyzed by qRT-PCR.

**A**

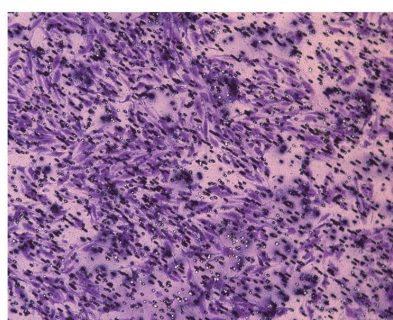

EV+miR-127 NC

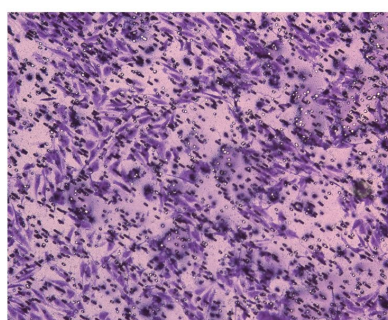

EV+miR-127 inhibitor

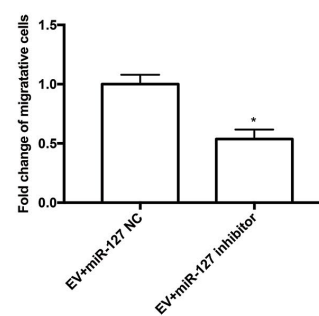

**B**

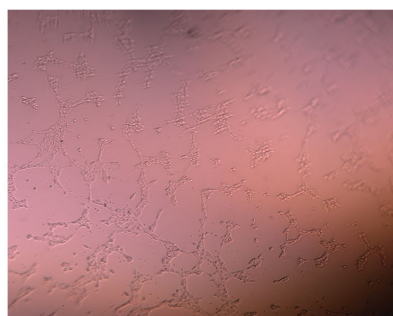

EV+miR-127 NC

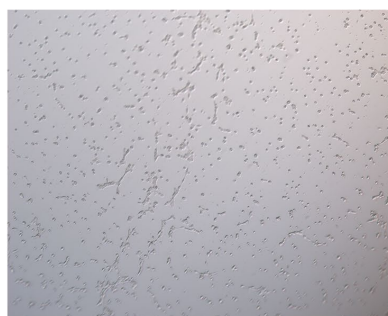

EV+miR-127 inhibitor

**Supplementary Figure 2. miR-127 inhibitor reversed the enhanced MS1 cells migration and tube formation by EVs secreted from MIN6 cells.** (A) Transwell migration assays and (B) tube formation assays were applied to explore cell migration and *in vitro* angiogenesis, respectively.
